# Supplementary material for: Clostridium difficile Biofilm: Remodeling Metabolism and Cell Surface to Build a Sparse and Heterogeneously Aggregated Architecture
Source: PubMed Central journal article supplement (PMC6143707; doi:10.3389/fmicb.2018.02084), 2018-09-12
Supplement: Image_8.pdf [file Image_8.pdf]

## Figure S8

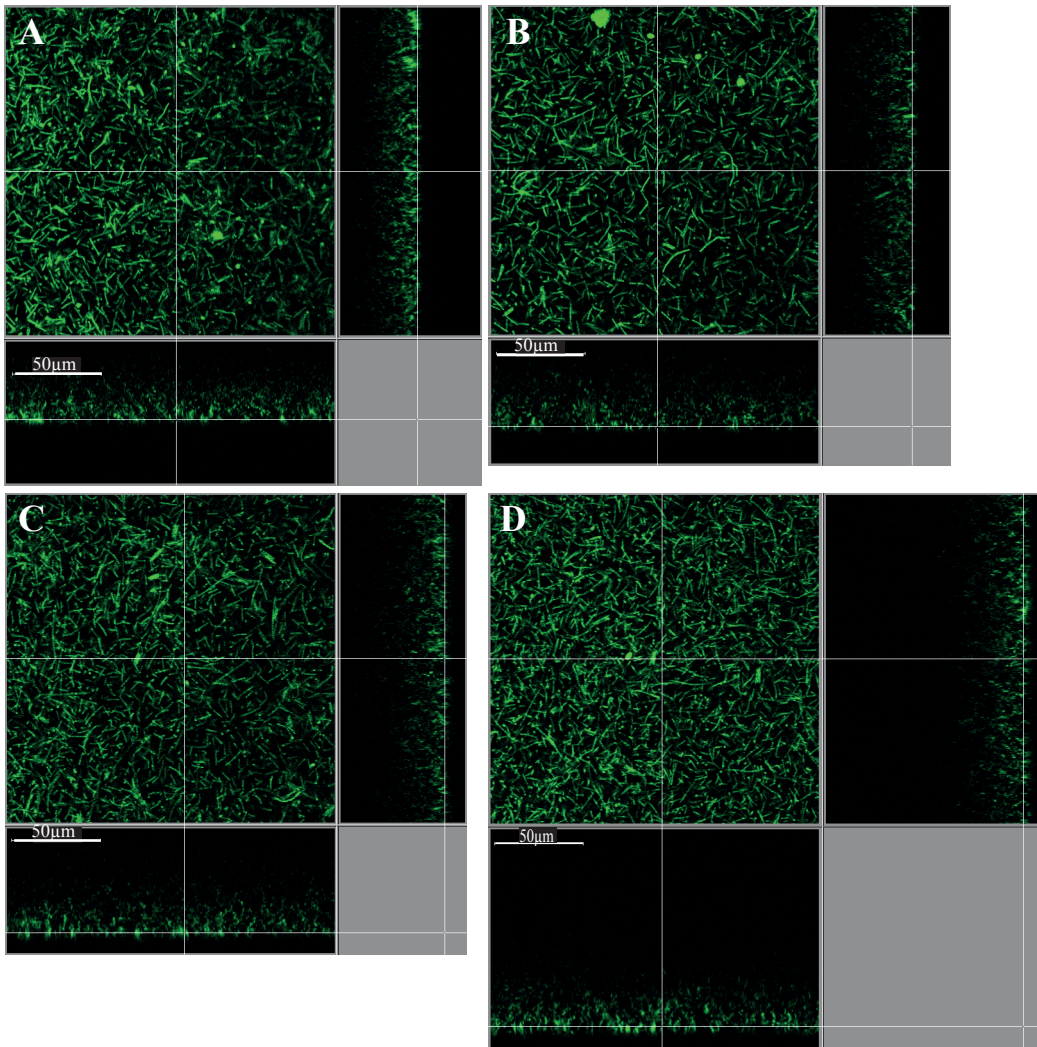

### Figure S8. Intact biofilm architecture of *pilA<sub>1</sub>* and *CD2831* mutant strains

Biofilm were grown from adhesive starter cells in TYt medium for 24h and in the presence of anhydro-tetracycline inducer as described in Figure 9. Intact biofilm staining and observation by CLMS were as described in Figure 8. A section view close to the surface is shown for the biofilm of each strain, with a white bar indicating the scale (50  $\mu\text{m}$ ). The following strains bearing the same empty vector (p) are shown: the parental strain (630 $\Delta\text{erm}$  p; in A and C), *pilA<sub>1</sub>* (*pilA<sub>1</sub>* p; in B) and *CD2831* mutants (*CD2831* p; in D). After data recovery and quantification of biofilm parameters, a statistical analysis revealed no significant difference between the parental and mutant strains (not shown).
