# Supplementary material for: Clostridium difficile Biofilm: Remodeling Metabolism and Cell Surface to Build a Sparse and Heterogeneously Aggregated Architecture
Source: PubMed Central journal article supplement (PMC6143707; doi:10.3389/fmicb.2018.02084), 2018-09-12
Supplement: Image_9.pdf [file Image_9.pdf]

**Figure S9**

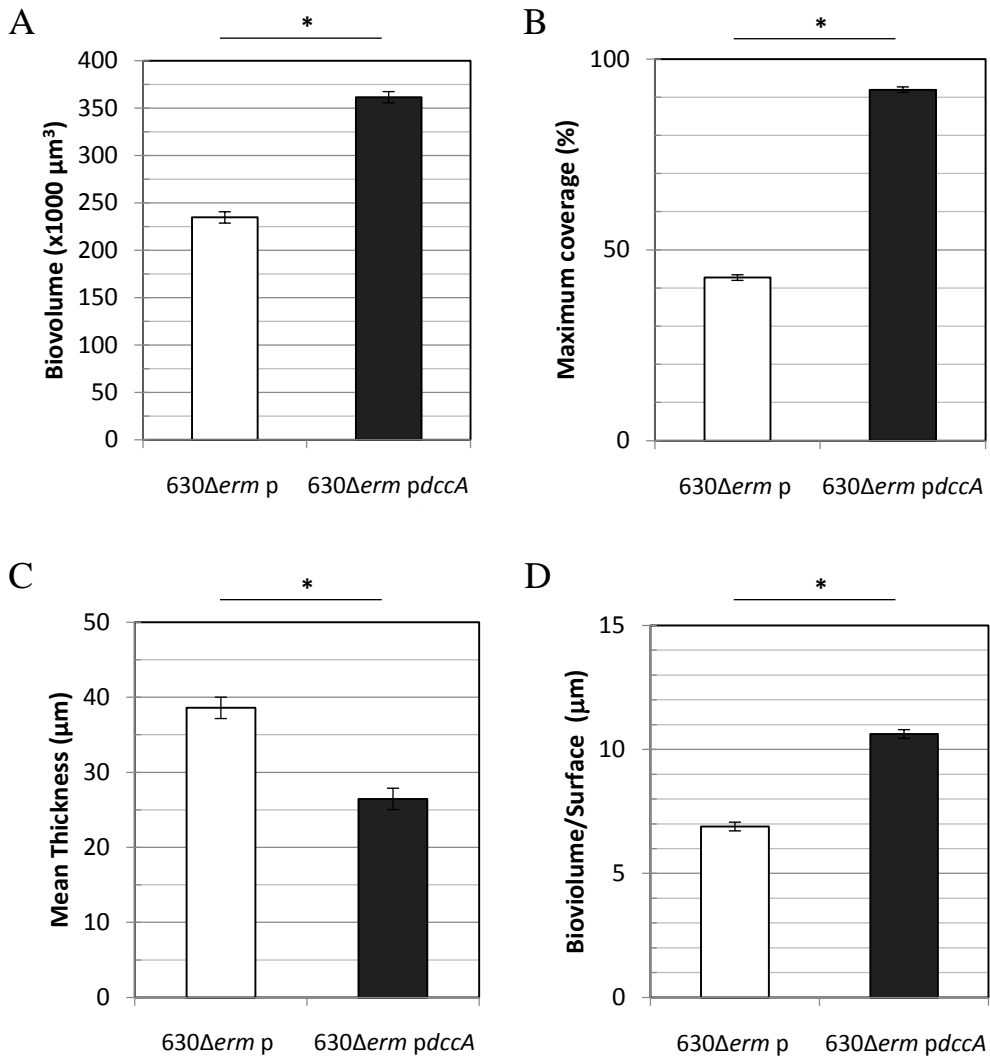

**Figure S9.** Comparison of the biofilms formed by strain 630Δerm over-expressing or not *dccA*

Biofilms were grown from adhesive cells in TYt medium in the presence of inducer as described in Figure 9. Intact biofilms were stained and observed by CLMS as described in Figure 8. Data were recovered and four parameters characterizing the 3D architecture of each biofilm: biovolume (A), maximum coverage (B), mean thickness (C) and biovolume/surface ratio (D) were quantified using ICY software as in Figure S6. The results of two experiments using independent clones for each strain are shown as histograms, with 630Δerm pdccA, the strain over-expressing *dccA*, in dark grey, and 630Δerm p, the control strain bearing the empty vector, in white. A statistical analysis was performed and stars (\*) indicate a significant difference between the two strains.
