# Supplementary material for: Clostridium difficile Biofilm: Remodeling Metabolism and Cell Surface to Build a Sparse and Heterogeneously Aggregated Architecture
Source: PubMed Central journal article supplement (PMC6143707; doi:10.3389/fmicb.2018.02084), 2018-09-12
Supplement: Image_10.pdf [file Image_10.pdf]

## Figure S10

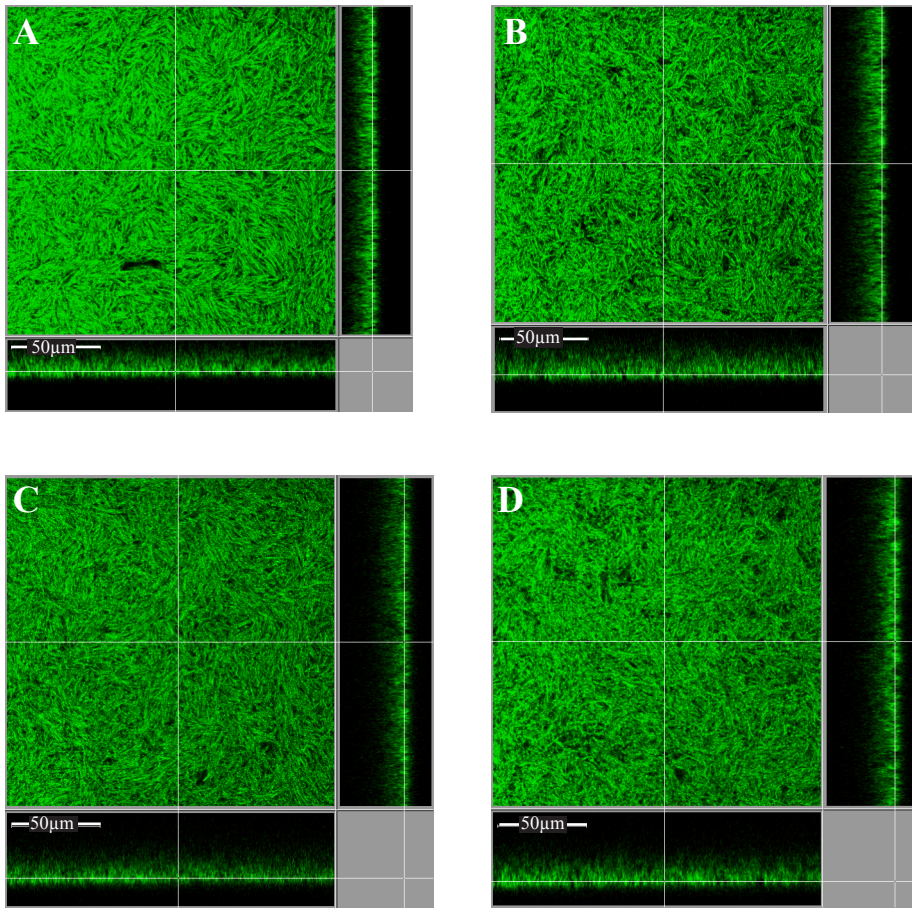

**Figure S10.** Intact biofilm architecture of *pilA<sub>1</sub>* and *CD2831* mutant strains over-expressing *dccA*

Biofilms were grown from adhesive cells in TYt medium for 24h in the presence of anhydro-tetracycline inducer as described in Figure 9. At the end of growth, intact biofilms were stained and observed as described in Figure 8. For each strain, a representative section view close to the surface is shown, with the white bar indicating the scale (50  $\mu\text{m}$ ). The parental (630 $\Delta\text{erm}$  *pdccA* in A and C) and mutant strains over-expressing *dccA* (*pilA<sub>1</sub>* *pdccA* in B and *CD2831* *pdccA* in D) are shown.
