# Supplementary material for: Clostridium difficile Biofilm: Remodeling Metabolism and Cell Surface to Build a Sparse and Heterogeneously Aggregated Architecture
Source: PubMed Central journal article supplement (PMC6143707; doi:10.3389/fmicb.2018.02084), 2018-09-12
Supplement: Table_1.pdf [file Table_1.pdf]

**Table S1.** Strains, plasmids and primers used in this study**A. Strains**

| <b>Name</b>                                  | <b>Genotype / Construction</b>                                                                                                                                                                                                                                                                                                          | <b>Reference / origin</b>                  |
|----------------------------------------------|-----------------------------------------------------------------------------------------------------------------------------------------------------------------------------------------------------------------------------------------------------------------------------------------------------------------------------------------|--------------------------------------------|
| <b><i>E. coli</i> strains</b>                |                                                                                                                                                                                                                                                                                                                                         |                                            |
| NEB 10 $\beta$                               | $\Delta(ara-leu)$ 7697 <i>araD</i> 139 <i>fhuA</i> $\Delta lacX74$ <i>galK</i> 16 <i>galE</i> 15 <i>e14-</i> $\phi 80dlacZ\Delta M15$ <i>recA</i> 1 <i>relA</i> 1 <i>endA</i> 1 <i>nupG</i> <i>rpsL</i> (Str <sup>R</sup> ) <i>rph</i> <i>spoT</i> 1 $\Delta(mrr-hsdRMS-mcrBC)$                                                         | New England Biolabs                        |
| HB101 (RP4)                                  | <i>supE</i> 44 <i>aa</i> 14 <i>galK</i> 2 <i>lacY</i> 1 $\Delta(gpt-proA)$ 62 <i>rpsL</i> 20 (Str <sup>R</sup> ) <i>xyl</i> -5 <i>mtl</i> -1 <i>recA</i> 13 $\Delta(mcrC-mrr)$ <i>hsdS</i> <sub>B</sub> ( <i>r</i> <sub>B</sub> - <i>m</i> <sub>B</sub> -) RP4 (Tra <sup>+</sup> IncP Ap <sup>R</sup> Km <sup>R</sup> Tc <sup>R</sup> ) | Laboratory stock                           |
| <b><i>C. difficile</i> strains</b>           |                                                                                                                                                                                                                                                                                                                                         |                                            |
| 630 $\Delta erm$                             | Model, toxinogenic strain (parental strain)                                                                                                                                                                                                                                                                                             | Laboratory stock<br>(Hussain et al., 2005) |
| ClosTron inactivation mutants                |                                                                                                                                                                                                                                                                                                                                         |                                            |
| <i>CD2214-CD2215</i><br>(or CDIP9)           | 630 $\Delta erm$ <i>CD2214::Intron(erm)</i> , Erm <sup>R</sup> Tm <sup>S</sup><br>obtained from 630 $\Delta erm$ (pMTL007-' <i>CD2214</i> '-142s), Tm <sup>R</sup>                                                                                                                                                                      | This work                                  |
| <i>CD2831</i>                                | 630 $\Delta erm$ <i>CD2831::Intron(erm)</i> , Erm <sup>R</sup> Tm <sup>S</sup><br>obtained from 630 $\Delta erm$ (pMTL007C-E5-' <i>CD2831</i> '-540), Tm <sup>R</sup>                                                                                                                                                                   | This work                                  |
| <i>pilA</i> <sub>1</sub>                     | 630 $\Delta erm$ <i>pilA</i> <sub>1</sub> :: <i>Intron(erm)</i> , Erm <sup>R</sup> Tm <sup>S</sup><br>obtained from 630 $\Delta erm$ (pMTL007C-E5-' <i>CD3513</i> '-282s), Tm <sup>R</sup>                                                                                                                                              | This work                                  |
| Plasmid containing strains                   |                                                                                                                                                                                                                                                                                                                                         |                                            |
| 630 $\Delta erm$ p<br>(or CDIP219)           | 630 $\Delta erm$ (pRPF185 P <sub>tet</sub> $\Delta gusA$ ), Tm <sup>R</sup>                                                                                                                                                                                                                                                             | (Soutourina et al.,<br>2013)               |
| <i>CD2831</i> p                              | <i>CD2831</i> (pRPF185 P <sub>tet</sub> $\Delta gusA$ ), Erm <sup>R</sup> Tm <sup>R</sup>                                                                                                                                                                                                                                               | This work                                  |
| <i>pilA</i> <sub>1</sub> p                   | <i>pilA</i> <sub>1</sub> (pRPF185 P <sub>tet</sub> $\Delta gusA$ ), Erm <sup>R</sup> Tm <sup>R</sup>                                                                                                                                                                                                                                    | This work                                  |
| <i>dccA</i> over-expression strains          |                                                                                                                                                                                                                                                                                                                                         |                                            |
| 630 $\Delta erm$ <i>pdccA</i><br>(or CDIP96) | 630 $\Delta erm$ (pRPF185 P <sub>tet</sub> <i>dccA</i> ), Tm <sup>R</sup>                                                                                                                                                                                                                                                               | (Soutourina et al.,<br>2013)               |
| <i>CD2831 pdccA</i>                          | <i>CD2831</i> (pRPF185 P <sub>tet</sub> <i>dccA</i> ), Erm <sup>R</sup> Tm <sup>R</sup>                                                                                                                                                                                                                                                 | This work                                  |
| <i>pilA</i> <sub>1</sub> <i>pdccA</i>        | <i>pilA</i> <sub>1</sub> (pRPF185 P <sub>tet</sub> <i>dccA</i> ), Erm <sup>R</sup> Tm <sup>R</sup>                                                                                                                                                                                                                                      | This work                                  |

## B. Plasmids

| Name                            | Genotype/Construction                                                                                                                                                    | Reference / Origin        |
|---------------------------------|--------------------------------------------------------------------------------------------------------------------------------------------------------------------------|---------------------------|
| Clostron mutagenesis            |                                                                                                                                                                          |                           |
| pGEM <sup>T</sup> Easy          | TA cloning vector                                                                                                                                                        | Promega                   |
| pGEM <sup>T</sup> ::2214        | pGEM <sup>T</sup> ::'CD2214'-142s                                                                                                                                        | This work                 |
| pGEM <sup>T</sup> ::2831        | pGEM <sup>T</sup> ::'CD2831'-540s                                                                                                                                        | This work                 |
| pGEM <sup>T</sup> ::3513        | pGEM <sup>T</sup> ::'CD3513'-282s                                                                                                                                        | This work                 |
| pMTL007                         | <i>E. coli/C. difficile</i> shuttle plasmid, <i>catP</i> , Cm <sup>R</sup> /Tm <sup>R</sup><br>Clostron mutagenesis, Group II Intron, <i>ermB</i> -RAM                   | (Heap et al., 2007)       |
| pMTL-2214<br>(or pDIA5918)      | pMTL007::'CD2214'-142s                                                                                                                                                   | This work                 |
| pMTL007C-E5                     | <i>E. coli/C. difficile</i> shuttle plasmid, <i>catP</i> , Cm <sup>R</sup> /Tm <sup>R</sup><br>Clostron mutagenesis, Group II Intron, <i>ermB</i> -RAM                   | (Heap et al., 2010)       |
| pMTL-C-2831                     | pMTL007C-E5::'CD2831'-540s                                                                                                                                               | This work                 |
| pMTL-C-3513                     | pMTL007C-E5::'CD3513'-282s                                                                                                                                               | This work                 |
| Expression vectors and plasmids |                                                                                                                                                                          |                           |
| pMTL84121                       | <i>E. coli/C. difficile</i> shuttle plasmid, <i>catP</i> , Cm <sup>R</sup> /Tm <sup>R</sup>                                                                              | (Heap et al., 2009)       |
| pDIA5945                        | pMTL84121::CD2214                                                                                                                                                        | This work                 |
| pDIA5946                        | pMTL84121::CD2214-CD2215                                                                                                                                                 | This work                 |
| p<br>(or pDIA6103)              | <i>E. coli/C. difficile</i> shuttle plasmid, <i>catP</i> , Cm <sup>R</sup> /Tm <sup>R</sup><br>cloning and over-expression vector<br>pRPF185 <i>P<sub>tet</sub>ΔgusA</i> | (Soutourina et al., 2013) |
| pdccA<br>(or pDIA5987)          | pRPF185 <i>P<sub>tet</sub> dccA</i><br>inducible expression of <i>dccA-CD1420</i> under <i>P<sub>tet</sub></i> control                                                   | (Soutourina et al., 2013) |

### C. Primers

| Name                               | Sequence                                                     |
|------------------------------------|--------------------------------------------------------------|
| Clostron mutagenesis               |                                                              |
| EBSu (universal)                   | CGAAATTAGAACTTGCGTTCAGTAAAC                                  |
| <i>CD2214</i>                      |                                                              |
| IMV373 142s-IBS                    | AAAAAAGCTTATAATTATCCTTAGAGACCAATACAGTGCGCCCAGATAGGGTG        |
| IMV374 142s-EBS1d                  | CAGATTGTACAAATGTGGTGATAACAGATAAGTCAATACATCTAACTTACCTTTCTTTGT |
| IMV375 142s-EBS2                   | TGAACGCAAGTTTCTAATTTGATTGTCTCTCGATAGAGGAAAGTGTCT             |
| <i>CD2831</i>                      |                                                              |
| <i>CD2831-540s-IBS</i>             | AAAAAAGCTTATAATTATCCTTAAATGACGACTATGTGCGCCCAGATAGGGTG        |
| <i>CD2831-540s-EBS1d</i>           | CAGATTGTACAAATGTGGTGATAACAGATAAGTCGACTATGGTAACTTACCTTTCTTTGT |
| <i>CD2831-540s-EBS2</i>            | TGAACGCAAGTTTCTAATTTGGTTTCATTCCGATAGAGGAAAGTGTCT             |
| <i>CD3513</i>                      |                                                              |
| <i>CD3513-282s-IBS</i>             | AAAAAAGCTTATAATTATCCTTAGATATCGGTGGAGTGCGCCCAGATAGGGTG        |
| <i>CD3513-282s-EBS1d</i>           | CAGATTGTACAAATGTGGTGATAACAGATAAGTCGGTGGAAATAACTTACCTTTCTTTGT |
| <i>CD3513-282s-EBS2</i>            | TGAACGCAAGTTTCTAATTTGATTATATCTCGATAGAGGAAAGTGTCT             |
| Sequencing                         |                                                              |
| pMTL007 / pMTL007C-E5              |                                                              |
| pMTL007-F                          | TTAAGGAGGTGATTTTCATATGACCATGATTACG                           |
| pMTL007-R                          | AGGGTATCCCCAGTTAGTGTTAAGTCTTGG                               |
| pMTL84121                          |                                                              |
| M13R                               | CAG GAA ACA GCT ATG AC                                       |
| M13F                               | GTTTTCCCAGTCACGAC                                            |
| pGEM <sup>T</sup> -easy            |                                                              |
| SP6                                | ATTTAGGTGACACTATAGAATAC                                      |
| T7                                 | GTAATACGACTCACTATAGGG                                        |
| Verification of Clostron insertion |                                                              |
| <i>ermB</i> gene (Intron)          |                                                              |
| RAM-F (ErmRAM-F)                   | ACGCGTTATATTGATAAAAATAATAATAGTGGG                            |
| RAM-R (ErmRAM-R)                   | ACGCGTGCGACTCATAGAATTATTTCTCCCG                              |

| Name                               | Sequence                          |
|------------------------------------|-----------------------------------|
| Verification of Clostron insertion |                                   |
| <i>CD2214</i> gene                 |                                   |
| OS238                              | TTGGTCAGATTGAAAGAGCTGA            |
| OS239                              | CAGAGTTATCAACGCCTTCTGTT           |
| <i>CD2831</i> gene                 |                                   |
| IP1 (2831-5' Intron)               | CAA GCT TTA GAA GAT GAA AAA CC    |
| IMV582 (3' Intron)                 | GCATCTGGAACATCCGTTTT              |
| <i>CD3513</i> gene                 |                                   |
| IP2 (3513-5' Intron)               | TTA CAC CAG ATG GTC AAA CTG G     |
| IP3 (3513-3' Intron)               | GTG CTT CTG TTA AGG TAA CTC C     |
| <b>qRT-PCR</b>                     |                                   |
| <i>rpoA-CD0098</i>                 |                                   |
| QRTBD005                           | TAA AGG TAG AGG TTA TGT TTC TGC T |
| QRTBD006                           | TTT GAC CAA CTC TTG TGT TTT CC    |
| <i>flgB-CD0245</i>                 |                                   |
| OS513                              | TGATGCTATGCCTAAAATAGAAGAAA        |
| OS514                              | CCATTTGCAAACCTTATCAAAGC           |
| <i>CD0581</i>                      |                                   |
| IMV593                             | AAACGGATACCGCTCTTGTG              |
| IMV594                             | CCAATGGTCGTGACGTGTAG              |
| <i>serA-CD0995</i>                 |                                   |
| IMV619                             | GGCGGTTTAGTTGATGAAAAA             |
| IMV620                             | GCCCCAATATGAGGTGTAGG              |
| <i>dccA-CD1420</i>                 |                                   |
| OS528                              | TGACCCATTA ACTGGAGCAT             |
| OS529                              | CTTGTCTCCTACATTATGACCTTCA         |
| <i>CD1581</i>                      |                                   |
| LS17                               | CAGCTAAATGGTTCCAAAATGA            |
| LS18                               | TCCTGAATCTGAACATCCACA             |
| <i>CD1616</i>                      |                                   |
| IMV617                             | TGGCAAAAGAGTTGGGTATG              |
| IMV618                             | CTTCAATTGGCATTGGCTTT              |

| Name                           | Sequence                      |
|--------------------------------|-------------------------------|
| <b>qRT-PCR</b>                 |                               |
| <i>CD2214</i>                  |                               |
| LS09                           | AAGGCAGGTTTACATCCAACA         |
| LS10                           | TTTGCAAATAACAATTCAAGTGG       |
| <i>CD2215</i>                  |                               |
| OS398                          | 3'TCATTTCCTAAATATGTTTTTCCAGTG |
| OS399                          | 5'ATGGTTGGAGTATCGCCTTG        |
| <i>pilW-CD2305</i>             |                               |
| IMV585                         | TGGCTTTAAAGATGACCCATT         |
| IMV586                         | TTCATGACCAGGAGATGACATT        |
| <i>cat1-CD2343</i>             |                               |
| IMV589                         | AGAAAATTGTGCCCATCCAG          |
| IMV590                         | CCATGATAAAGCTTCGTCCAA         |
| <i>cwp84-CD2787</i>            |                               |
| 2787-ql                        | TGGCAAATGGTGTAAATGGA          |
| 2787-qr                        | TCAGCACCTTGCAACTCACT          |
| <i>cwp66-CD2789</i>            |                               |
| IMV470                         | TCAAGCTGGGTGGACAAAAGT         |
| IMV471                         | ATATTGGCGCATCTTTTGCT          |
| <i>CD2831</i>                  |                               |
| OS582                          | AAAAGAAGGGGAACCTGTGC          |
| OS583                          | CTCCTGGAGGACTTGAACCA          |
| <i>malY-CD3029</i>             |                               |
| LS45                           | AAATTGGTCATGCCAGAAGG          |
| LS46                           | CAGACCCCGACATAATAGCAA         |
| <i>pilA<sub>1</sub>-CD3513</i> |                               |
| OS580                          | CAGTAGTGGCAGTTCCAGCTT         |
| OS581                          | CCAGTTTGACCATCTGGTGT          |
| <i>luxS-CD3598</i>             |                               |
| 3598-ql                        | GGGGAGATGTAGATGCCAAA          |
| 3598-qr                        | TCCTTTGCCCAAATAAAGA           |
| <i>dnaF-CD1305</i>             |                               |
| RT_polIII-F_Cdiff              | TCCATCTATTGCAGGGTGGT          |
| RT_polIII-R_Cdiff              | CCCAACTCTTCGCTAAGCAC          |

## References

- Heap, J.T., Kuehne, S.A., Ehsaan, M., Cartman, S.T., Cooksley, C.M., Scott, J.C., and Minton, N.P. (2010). The Clostron: Mutagenesis in *Clostridium* refined and streamlined. *J Microbiol Methods* 80, 49-55.
- Heap, J.T., Pennington, O.J., Cartman, S.T., Carter, G.P., and Minton, N.P. (2007). The Clostron: a universal gene knock-out system for the genus *Clostridium*. *J Microbiol Methods* 70, 452-464.
- Heap, J.T., Pennington, O.J., Cartman, S.T., and Minton, N.P. (2009). A modular system for *Clostridium* shuttle plasmids. *J Microbiol Methods* 78, 79-85.
- Hussain, H.A., Roberts, A.P., and Mullany, P. (2005). Generation of an erythromycin-sensitive derivative of *Clostridium difficile* strain 630 (630 $\Delta$ erm) and demonstration that the conjugative transposon Tn916 $\Delta$ E enters the genome of this strain at multiple sites. *J Med Microbiol* 54, 137-141.
- Soutourina, O.A., Monot, M., Boudry, P., Saujet, L., Pichon, C., Sismeiro, O., Semenova, E., Severinov, K., Le Bouguenec, C., Coppee, J.Y., Dupuy, B., and Martin-Verstraete, I. (2013). Genome-wide identification of regulatory RNAs in the human pathogen *Clostridium difficile*. *PLoS Genet* 9, e1003493.
